1 **Title**

2 Immunotoxic Effects in Children Resulting from Prenatal and Early Childhood Exposure to Pesticides:  
3 Protocol and Pilot Study of a Systematic Review and Meta-Analysis

4 **Authors**

5 Moustafa Sherif<sup>1</sup>, Aya Darwish<sup>2</sup>, Balázs Ádám<sup>1</sup>

6 <sup>1</sup> Institute of Public Health, College of Medicine and Health Sciences, United Arab Emirates  
7 University, POBox 15551, Al-Ain, AbuDhabi, United Arab Emirates; 202190149@uaeu.ac.ae (MS);  
8 badam@uaeu.ac.ae (BÁ)

9 <sup>2</sup> Department of Physiology, Faculty of Veterinary Medicine, Benha University, POBox 17321, Toukh,  
10 Al-Qalyubia, Egypt; Ayavet27@hotmail.com (AD)

11 **Corresponding Author**

12 Balázs Ádám; [badam@uaeu.ac.ae](mailto:badam@uaeu.ac.ae)

13 **Authors' ORCIDs**

14 Moustafa Sherif; <http://orcid.org/0000-0002-8781-5098>

15 Aya Darwish; <https://orcid.org/0009-0009-7251-5525>

16 Balázs Ádám; <http://orcid.org/0000-0002-9765-7142>

17 **Impact Statement**

18 This study will establish a high level of evidence to highlight the critical immunotoxic risks of prenatal  
19 and early childhood pesticide exposure, offering essential insights for public health policies and  
20 interventions to safeguard the infants during this vulnerable developmental periods.

21

22

23

24

25

26

27

28

29

30

31

32

33

## 34 **Abstract**

35 **Background** Pesticides, commonly employed in both agricultural and domestic environments, have  
36 been associated with disturbing the balance of the immune system during prenatal and early  
37 childhood phases of development. This disturbance has the potential to result in various outcomes  
38 such as autoimmunity, immunosuppression, inflammation, hypersensitivity, tissue damage, and  
39 overall alterations in immune modulation. The escalating concern regarding the immunotoxic effects  
40 of pesticides necessitates a systematic review and potential meta-analysis to consolidate empirical  
41 evidence and address the knowledge gaps. This systematic review aims to comprehensively assess  
42 the immunotoxic impact of pesticide exposure on children, considering alterations in immune  
43 system function induced by specific types of pesticides.

44 **Methods** Through a meticulous search of the literature and synthesis of findings, the review will  
45 scrutinize prevalence, effect size, mechanisms, vulnerable periods, and the role of pre-existing  
46 conditions. The submitted protocol to PROSPERO aligns with the Preferred Reporting Items for  
47 Systematic Reviews and Meta-Analyses Protocols (PRISMA-P) statement, ensuring methodological  
48 rigor. A preliminary exploration involved a systematic search in electronic databases based on a pre-  
49 defined Population, Exposure, Comparator, and Outcome (PECO) statement. Data extraction sheets  
50 and risk of bias assessment tools were piloted on eight eligible articles to ensure reliability and  
51 efficiency. Subsequently, a rerun of the search will be executed, and two independent reviewers will  
52 employ the systematic review tool Covidence for article screening and data extraction, and Excel for  
53 risk of bias assessment. The results will be synthesized narratively in summary tables, and, if findings  
54 allow, meta-analysis including subgroup and sensitivity analysis will be conducted.

55 **Discussion** By elucidating the intricate relationship between pesticide exposure and immunotoxicity  
56 during prenatal and early childhood, this review will provide insights into immune response that can  
57 contribute to public health awareness and guide interventions.

58 **PROSPERO Registration number:** [CRD42024510916].

## 59 **Keywords**

60 Pesticides; immunotoxicity; children; prenatal exposure; vulnerable periods.

## 61 **Background**

62 Human susceptibility to environmental factors, particularly pesticides, has emerged as a significant  
63 public health concern <sup>1,2</sup>. The Developmental Origin of Human Disease (DOHAD) theory, as proposed  
64 by David Barker, asserts that environmental conditions experienced in the initial stages of  
65 development can have lasting effects on subsequent phases of life <sup>3</sup>. Consequently, exposure to  
66 environmental pollutants during the in-utero period can increase the predisposition to a range of  
67 pathologies, manifesting in both early and later stages of life. Recognizing and addressing the impact  
68 of environmental elements on human health across developmental stages becomes imperative in  
69 light of these findings. An increasing body of evidence suggests that children's health is profoundly  
70 influenced by exposure to pesticides that are widely used in both agricultural and household  
71 settings. These chemical compounds can have significant consequences when interfering with  
72 embryonic development <sup>4</sup>.

73 Women, especially who are living in areas with spraying activities to control vector borne diseases,  
74 face significant exposure to organochlorine (OC) pesticides like DDT and its byproducts. Studies show  
75 high levels of these pesticides in maternal serum (26.2 µg/g lipids) and cord blood (up to 4.4 µg/g  
76 lipids), indicating their ability to pass through the placenta. Breast milk further exposes infants, with

77 concentrations reaching 6.9 µg/g lipids<sup>5</sup>. Susceptibility during prenatal and early childhood is  
78 attributed to global epigenetic reprogramming, increased rates of cell proliferation, and intricate  
79 organogenesis events<sup>6</sup>. Various factors, including the quantity, timing, and nature of exposure, play  
80 a significant role in shaping long-term immune responses, that may also be influenced by genetic  
81 factors, as previously indicated<sup>7,8</sup>. Aligning with the exposome paradigm<sup>9</sup>, it is crucial to take into  
82 account the cumulative impact of a wide range of environmental factors when assessing the effects  
83 of prenatal exposure on the immune system.

84 Few studies investigated the impact of pesticides and other environmental contaminants on infants'  
85 immune responses, revealing different levels and directions of associations. For instance, a study  
86 examined the impact of exposure to dioxins, PCBs, and organochlorine pesticides on 10-month-old  
87 infants revealed that higher concentrations of heptachlor epoxide, chlordane, and dioxins in breast  
88 milk were significantly associated with increased percentages of CD8+ T cells and CD3+ T cells, along  
89 with alterations in the CD4+ to-CD8+ ratio<sup>10</sup>. Furthermore, T cells isolated from cord blood exhibited  
90 a negative association between their proliferation, when stimulated, and levels of PCBs and 4,4'-  
91 dichlorodiphenyl-dichloroethene (4,4'-DDE) in newborns prenatally exposed to organochlorine  
92 compounds and mercury<sup>11</sup>. Another finding indicated that the secretion of TNF-α by cord blood  
93 mononuclear cells, under mitogen stimulation, was negatively associated with prenatal  
94 organochlorine exposure<sup>12</sup>. In 6-month-old infants, elevated levels of PCB-153 and DDE were  
95 significantly linked to lower levels of BCG-specific antibodies<sup>13</sup>. Notably, a study<sup>14</sup> discovered higher  
96 pesticide levels in umbilical cord plasma than in mothers, but genotoxicity markers in immune cells  
97 did not correlate. This lack of correlation might be attributed to variations in exposure, pregnancy-  
98 related processes, and individual differences.

99 The mechanisms of effects of prenatal exposures on the foetal immune system have numerous  
100 knowledge gaps because various pesticides can have different impacts based on the organ, cell type,  
101 and molecular pathway<sup>15-17</sup>, which is necessitating the consolidation of the current evidence to  
102 highlight further considerations of research for the future. For example, there are no specific  
103 validated biomarkers in tissues, such as in placenta or body fluids, that can be used to capture  
104 exposure-dependent differences in changes in the immune system<sup>18</sup>.

## 105 **Objective**

106 By synthesizing existing literature, this systematic review with a potential meta-analysis aims to  
107 critically evaluate the immunotoxic consequences arising from pesticide exposure during crucial  
108 developmental phases, showcasing a nuanced interplay that can shift immune equilibrium towards  
109 immunosuppression or immunoenhancement, heightening the risk for infectious or chronic diseases,  
110 hypersensitivity, allergies, inflammation, tissue injury, or autoimmunity. It will consolidate empirical  
111 evidence, provide valuable insights and address knowledge gaps in the intricate relationship  
112 between pesticide exposure and immunotoxicity in children. Understanding the complex pathways  
113 and mechanisms influenced by prenatal immunotoxic exposures necessitates a systematic approach,  
114 with a thorough evaluation of the specific pesticides and their metabolites. This systematic review  
115 will provide synthesized knowledge that can guide researchers to develop targeted intervention  
116 strategies, by highlighting the numerous epidemiological studies linking pesticide exposure to  
117 alterations in children's immune responses. Recognizing the sources and routes of exposure during  
118 critical periods is crucial to unravel the complex pathways through which pesticides exert  
119 immunotoxic effects. Additionally, identifying commonly used biomarkers and endpoints for  
120 assessing immune system effects enhances methodological robustness.

## 121 **Methods/Design**

122 1. Protocol and registration

123 The protocol was registered in the International Prospective Register of Systematic Reviews  
124 (PROSPERO) [CRD42024510916]. This protocol follows the PRISMA-P statement that refers to the  
125 Preferred Reporting Items for Systematic Reviews and Meta-Analyses Protocols<sup>19</sup>. The scheduled  
126 start date of the study is 1st April 2023 and will continue until 1st November 2024. The PRISMA-P  
127 checklist is accessible as a supplemental file (S1). The final review will go along with the new PRISMA  
128 2020 statement<sup>20,21</sup>.

129 2. Eligibility criteria

130 A population, exposure, comparator and outcomes (PECO) statement was established to review data  
131 on immunotoxicity of pesticide exposures occurring in the prenatal and postnatal period to infants  
132 and children below five years of age.

133 A. Participants/population

134 Inclusion: Embryos, fetuses, infants, young children up to 5 years of age, and pregnant mothers (if  
135 the placenta was investigated) will be considered.

136 Exclusion: Children over 5 years of age and pregnant mothers who developed immunotoxicity in any  
137 tissue other than the placenta will be excluded.

138 B. Intervention(s), exposure(s)

139 Inclusion: Exposure to pesticides during the prenatal and/or early childhood periods up to the age of  
140 5 years, regardless of whether they provide specific information on the types of pesticides or their  
141 metabolites or the route of exposure, as well as biomarkers of pesticide exposure in mothers to  
142 draw associations with the level of immunotoxicity in their paired children, will be considered.  
143 Additionally, exposure through maternal blood, placental transfer, or breastfeeding will be taken  
144 into account.

145 Exclusion: Exposure to environmental contaminants other than pesticides and exposure to pesticides  
146 during time periods other than the prenatal and/or early childhood periods.

147 C. Comparator/Control

148 A comparison group (e.g., unexposed or low-exposure group) are required specifically for assessing  
149 the association/effect size. No comparator group is needed for research on prevalence of exposure,  
150 prevalence and mechanisms of effects. The mothers can act as comparator for their paired children.

151 D. Outcome

152 The systematic review will include studies reporting outcomes specifically related to the  
153 immunotoxic impact of prenatal and early childhood pesticide exposure in children. Eligible  
154 outcomes for inclusion encompass immune system function, incorporating measures such as  
155 cytokine profiles, immune cell counts, and immune cell activity, as well as associations between  
156 prenatal/early childhood pesticide exposure and immunotoxicity. Studies reporting outcomes  
157 outside of these predefined categories or specifically focusing on allergies, infectious diseases, and  
158 childhood cancers, including leukemia and lymphoma, will be excluded from the review. This  
159 exclusion aims to maintain a focused investigation specifically on the impact of pesticide exposure  
160 on the functioning of the immune system, without extending immunotoxicity to particular health  
161 conditions.

### 162 3. Types of studies

163 The review will encompass observational studies, including cross-sectional, case-control, and cohort  
164 studies, to investigate the research objectives. Conversely, certain types of studies will be excluded  
165 from the review, such as *in vitro* and *in vivo* animal studies, case reports, opinion articles,  
166 commentaries, letters, review articles, published abstracts, and conference proceedings. By adhering  
167 to these inclusion and exclusion criteria, the review aims to focus on high-quality original studies  
168 that directly contribute to addressing the research objectives.

### 169 4. Information sources

170 We will search systematically for studies that match our criteria and are published in peer-reviewed  
171 scientific journals in electronic four databases: PubMed (NLM), EMBASE (Elsevier), Web of Science  
172 (Clarivate), and Scopus (Elsevier).

### 173 5. Search strategy

174 We conducted preliminary searches in the four databases in February 2024 based on the PECO  
175 statement with inclusion and exclusion criteria as defined above. Identified search terms were  
176 systematically developed with the help of PubMed's MeSH and the search technical specifications.  
177 The pre-search is available in a supplemental file (S2).

178 A full systematic search of the literature will be conducted in April 2024 based on the strategy  
179 developed in the pre-search. The search will be performed by applying all search terms in the  
180 databases MeSH/thesauruses and in the "title" and "abstract" fields. All databases will be searched  
181 from their inception. A filter for English language will be used. No additional filters or limitations will  
182 be applied for the best possible results and to capture all pre-indexed studies. The PRISMA S  
183 checklist for searching and reproducible search strings for all databases will be provided as an  
184 appendix in the final review.

185 The search will be updated in all databases ahead of completing the study to ensure the inclusion of  
186 potential eligible studies published during the review process. Finally, the reference lists of the  
187 included studies and identified systematic reviews will be screened manually by two independent  
188 reviewers.

### 189 6. Study records and management

#### 190 A. Data management

191 Records located in the literature search will be uploaded to the systematic review software  
192 Covidence for title/abstract and full text screening, conflict resolving, selection, and data extraction.  
193 All modules in Covidence are blinded.

#### 194 B. Selection process

195 All records retrieved in the search will be automatically de-duplicated and screened in Covidence.  
196 Two review authors will independently screen the titles and abstracts of the studies and assess them  
197 if they are potentially eligible according to the inclusion and exclusion criteria. The same reviewers  
198 together with the National Medical Library team at UAEU will then work to recover the full text of  
199 the selected studies. If there are any disagreements about inclusion of certain studies in either  
200 screening rounds, consensus will be determined by a third reviewer through the blinded conflict  
201 module in Covidence. PRISMA flow-diagram will be used to record the results of the screening and

202 selection process, including reasons for full text exclusion<sup>21</sup>. Finally, Cabell's Predatory Reports will  
203 be used to confirm the academic quality of eligible studies published in open access journals.

#### 204 7. Data collection process

205 The data extraction template was developed and pilot tested on eight articles in Excel as shown in  
206 the supplemental file (S3). The template will be populated in Covidence, where independent data  
207 extraction will be performed by two reviewers. In case of any discrepancies, a third reviewer will  
208 resolve it using the blinded conflict resolving function of the extraction module in Covidence. If  
209 necessary, we will contact study authors to retrieve any missing data.

#### 210 8. Data items and extraction

211 Data extraction will include publication details, specifics of study settings, in-depth characteristics of  
212 the study populations and their sample sizes, demographic information regarding the participants  
213 and their baseline characteristics, descriptions of the types of pesticides to which participants are  
214 exposed, details about the levels of pesticide exposure (measured or assessed), biomarkers and  
215 endpoints of immunotoxicity, effect sizes and strength of associations. Additionally, information will  
216 be retrieved on the identified mechanisms by which pesticide exposure during the prenatal and early  
217 childhood periods may affect immune system development in children. Finally, information on  
218 conflicts of interest and funding sources will also be collected. If uncertainties arise, the data  
219 extractor will initiate a discussion with a second reviewer to make the final decision.

#### 220 9. Risk of bias (RoB) in individual studies

221 The risk of bias in the included studies will be appraised by two skilled reviewers using the  
222 Newcastle-Ottawa Scale (NOS) for case-control and cohort studies. Additionally, based on NOS, we  
223 have developed a novel risk of bias tool for assessing bias in cross-sectional studies. In cases where  
224 there are uncertainties regarding the risk of bias for specific studies, a third reviewer will be  
225 consulted to resolve it. The RoB tools, including the newly developed for this systematic review,  
226 were pilot tested on eight articles as displayed in supplemental file (S4). Two reviewers will  
227 individually assess the RoB in the eligible studies. Any discrepancies over the risk of bias assessment  
228 of particular studies between the two reviewers will be solved by a third reviewer.

#### 229 11. Data synthesis

230 We will perform a comprehensive narrative synthesis of the findings extracted from the included  
231 studies, structured around the type of pesticides under investigation, population characteristics, and  
232 the nature of immunotoxicity. This synthesis will provide a coherent and systematic overview of the  
233 results and conclusions derived from the primary research.

234 If two or more studies are found with appropriate estimates on outcome frequency and/or on effect  
235 size, two reviewers will individually explore the clinical heterogeneity of the studies and combine  
236 them for meta-analysis. A meta-analysis may be conducted specifically to quantify the effect size of  
237 prenatal/early childhood pesticide exposure immunotoxicity in children. In addition to the narrative  
238 synthesis, this quantitative analysis will provide a more precise assessment of the strength and  
239 direction of the association between pesticide exposure and immunotoxicity. The decision to  
240 conduct a meta-analysis will be based on the availability and quality of data from the selected  
241 studies, and it will be detailed in the systematic review.

242 If the combined studies are clinically sufficiently homogenous, the frequency and/or effect estimates  
243 will be pooled in a quantitative meta-analysis, using the inverse variance method with a random-

244 effects model to account for cross-study heterogeneity<sup>22</sup>. Statistical heterogeneity of the studies will  
245 be analyzed using the  $I^2$  statistics<sup>23</sup>. The meta-analysis will be performed in RevMan software<sup>24</sup>. The  
246 combined estimations will be shown in forest plots.

247 The funnel plot graphic representation will be used to visually evaluate publication bias, and we will  
248 run a sensitivity analysis in case of the presence of outliers or asymmetry in the funnel plot.

## 249 12. Analysis of subgroups or subsets

250 Analysis of subgroups or subsets will be conducted if there are indications of variations in the  
251 strength of association and effect size of immune system impairment estimates based on population  
252 characteristics, such as country, sex, age, on type of pesticides or their specific metabolites, as well  
253 as on the mechanisms by which they may impact the immune system. These subgroup analyses will  
254 allow for a more detailed examination of potential differences within specific subgroups, providing  
255 valuable insights into the relationship between pesticide exposure and its impact on immunotoxicity  
256 in children.

## 257 13. Quality of cumulative evidence (QoE)

258 The quality of evidence will be assessed by all reviewers using the Grading of Recommendations  
259 Assessment, Development and Evaluation (GRADE) tool to assess individual risk for bias,  
260 inconsistency, indirectness, imprecision, and publication bias. GRADE scoring assessment tool will  
261 allow us to provide summary-based evidence statements<sup>25,26</sup>.

## 262 Discussion

### 263 1. Purpose

264 A successful pregnancy relies on effective communication between the mother and the developing  
265 baby. The placenta is vital for providing nutrients, supporting hormone functions, and processing  
266 medications during the embryo's growth<sup>27</sup>. This communication includes not only normal  
267 substances but also potential dangers like drugs, food additives, pesticides, and environmental  
268 pollutants<sup>28</sup>. Under normal conditions, a healthy immune system physiologically maintains a balance  
269 between its innate and adaptive components, distinguishing self from nonself and combating foreign  
270 material; however, environmental or occupational exposures can disrupt this balance, leading to  
271 immune-suppression or -enhancement and therefore increase in vulnerability to infectious or  
272 chronic diseases, respectively<sup>29</sup>. This systematic review aims to comprehensively analyze the  
273 immunotoxic impact of prenatal and early childhood exposure to pesticides in children, with defined  
274 objectives to evaluate pesticide impact and identify vulnerable developmental periods through  
275 synthesizing existing literature and addressing knowledge gaps. It will assess the prevalence of  
276 pesticide exposure during critical developmental periods, determine the association with  
277 immunotoxicity, and identify specific pesticides and metabolites impacting the immune system. The  
278 study will investigate mechanisms of immunotoxicity, identifying biomarkers and endpoints in  
279 prenatal stages and in children up to five years of age. Additionally, it will examine available  
280 evidence on pre-existing conditions and vulnerable periods influencing susceptibility. Through  
281 meticulous application of inclusion and exclusion criteria and systematic search strategies, the study  
282 provides insights for researchers and policymakers, contributing to the understanding of  
283 immunotoxic consequences and informing public health initiatives.

### 284 2. Strengths and limitations

285 Limitations of this study include potential challenges in uncovering pathomechanisms due to the  
286 observational nature of the included studies. While analytical epidemiological studies can establish  
287 causality, their capacity to delve into detailed pathomechanisms is typically limited. The diversity in  
288 study designs, exposure assessment methods, and outcome measurements across different studies  
289 may introduce heterogeneity, limiting the ability to conduct a uniform meta-analysis. Additionally,  
290 the reliance on published literature may imply publication bias, as negative or non-significant  
291 findings may be underrepresented. The lack of standardized biomarkers for assessing immune  
292 system effects and the variability in the timing and duration of pesticide exposure in the included  
293 studies may also pose challenges in synthesizing consistent evidence. Moreover, the available  
294 evidence may be influenced by confounding factors, such as genetic predispositions and other  
295 environmental exposures, that were not consistently accounted for across studies.

296 Despite these limitations, the study has several strengths. The systematic review adopts a rigorous  
297 and transparent methodology, aligning with the PRISMA-P guidelines and utilizing established risk of  
298 bias assessment tools. The plans for a potential meta-analysis enhance the quantitative synthesis of  
299 evidence, providing a more robust evaluation of the association between pesticide exposure and  
300 immunotoxicity. The comprehensive search strategy, involving major electronic databases and  
301 manual screening of reference lists, ensures a thorough exploration of the existing literature. The  
302 focus on vulnerable populations, such as pregnant mothers and children up to five years of age,  
303 contributes to the identification of critical developmental periods.

### 304 3. Implications for practice and research

305 By addressing knowledge gaps and consolidating empirical evidence, this study offers valuable  
306 insights for researchers, policymakers, and public health initiatives seeking to understand and  
307 mitigate the immunotoxic consequences of pesticide exposure early in life.

### 308 List of abbreviations

|        |                                                                    |
|--------|--------------------------------------------------------------------|
| PRISMA | Preferred Reporting Items for Systematic Reviews and Meta-analyses |
| PECO   | population, exposure, comparator and outcomes                      |
| RoB    | Risk of bias                                                       |
| NOS    | Newcastle-Ottawa Scale                                             |
| GRADE  | Grading of Recommendations Assessment, Development and Evaluation  |
| QoE    | Quality of cumulative evidence                                     |

309

### 310 Supplementary Information

311 The online version contains supplementary material available at: XXX

312 PRISMA-P checklist: supplemental file (S1)

313 Pre-search string: supplemental file (S2)

314 Extraction sheet including pilot extraction: supplemental file (S3)

315 RoB sheet including pilot RoB assessment: supplemental file (S4)

### 316 Acknowledgements

317 Not applicable

### 318 Authors' contributions

319 MS, AD, and B  were involved in conceptualization and protocol development. MS and AD have developed the search strategy. Literature  
320 search will be conducted by MS and AD. Screening will be performed by MS and AD, with B  resolving conflicts. MS and AD will extract  
321 data, which will be validated by B . RoB will be performed by MS and AD, with B  resolving conflicts. Quality of evidence will be assessed  
322 by all reviewers.



## 323 Funding

324 The contribution of AD was funded by the PathFinder Epidemiology Academy [24PFA03, 2024].

## 325 Availability of data and materials

326 Data sharing is not applicable to this article as no datasets were generated or analysed during the current study.

## 327 Declarations

### 328 Ethics approval and consent to participate

329 Ethics approval is not necessary for such type of research (systematic review), because no public members or patients will participate in  
330 the study. No patient consent is required for this study.

### 331 Consent for publication

332 Not applicable

### 333 Competing interests

334 Authors declare no conflicts of interest.

## 335 References

- 336 1. Ramadhan Makame K, Sherif M, Ostlundh L, Sandor J, Adam B, Nagy K. Are encapsulated pesticides less harmful to human health  
337 than their conventional alternatives? Protocol for a systematic review of in vitro and in vivo animal model studies. *Environ Int.*  
338 2023;174:107924. doi:10.1016/j.envint.2023.107924
- 339 2. Sherif M, Makame KR, Ostlundh L, et al. Genotoxicity of Occupational Pesticide Exposures among Agricultural Workers in Arab  
340 Countries: A Systematic Review and Meta-Analysis. *Toxics.* 2023;11(8):663. doi:10.3390/toxics11080663
- 341 3. Wadhwa PD, Buss C, Entringer S, Swanson JM. Developmental origins of health and disease: brief history of the approach and  
342 current focus on epigenetic mechanisms. *Semin Reprod Med.* 2009;27(5):358-368. doi:10.1055/s-0029-1237424
- 343 4. Tang ZR, Xu XL, Deng SL, Lian ZX, Yu K. Oestrogenic Endocrine Disruptors in the Placenta and the Fetus. *Int J Mol Sci.*  
344 2020;21(4):E1519. doi:10.3390/ijms21041519
- 345 5. al-Saleh I, Shinwari N, Basile P, et al. DDT and its metabolites in breast milk from two regions in Saudi Arabia. *J Occup Environ Med.*  
346 2003;45(4):410-427. doi:10.1097/01.jom.0000058344.05741.22
- 347 6. Legoff L, D' Cruz SC, Tevosian S, Primig M, Smagulova F. Transgenerational Inheritance of Environmentally Induced Epigenetic  
348 Alterations during Mammalian Development. *Cells.* 2019;8(12):E1559. doi:10.3390/cells8121559
- 349 7. Chen CH, Lee YL, Wu MH, et al. Environmental tobacco smoke and male sex modify the influence of IL-13 genetic variants on cord  
350 blood IgE levels. *Pediatr Allergy Immunol Off Publ Eur Soc Pediatr Allergy Immunol.* 2012;23(5):456-463. doi:10.1111/j.1399-  
351 3038.2012.01278.x
- 352 8. Fedulov AV, Kobzik L. Allergy risk is mediated by dendritic cells with congenital epigenetic changes. *Am J Respir Cell Mol Biol.*  
353 2011;44(3):285-292. doi:10.1165/rcmb.2009-0400OC
- 354 9. Hong X, Liu C, Chen X, et al. Maternal exposure to airborne particulate matter causes postnatal immunological dysfunction in mice  
355 offspring. *Toxicology.* 2013;306:59-67. doi:10.1016/j.tox.2013.02.004
- 356 10. Nagayama J, Tsuji H, Iida T, et al. Immunologic effects of perinatal exposure to dioxins, PCBs and organochlorine pesticides in  
357 Japanese infants. *Chemosphere.* 2007;67(9):S393-398. doi:10.1016/j.chemosphere.2006.05.134
- 358 11. Belles-Isles M, Ayotte P, Dewailly E, Weber JP, Roy R. Cord blood lymphocyte functions in newborns from a remote maritime  
359 population exposed to organochlorines and methylmercury. *J Toxicol Environ Health A.* 2002;65(2):165-182.  
360 doi:10.1080/152873902753396794
- 361 12. Bilrha H, Roy R, Moreau B, Belles-Isles M, Dewailly E, Ayotte P. In vitro activation of cord blood mononuclear cells and cytokine  
362 production in a remote coastal population exposed to organochlorines and methyl mercury. *Environ Health Perspect.*  
363 2003;111(16):1952-1957. doi:10.1289/ehp.6433
- 364 13. Jusko TA, De Roos AJ, Lee SY, et al. A Birth Cohort Study of Maternal and Infant Serum PCB-153 and DDE Concentrations and  
365 Responses to Infant Tuberculosis Vaccination. *Environ Health Perspect.* 2016;124(6):813-821. doi:10.1289/ehp.1510101

- 366 14. Alvarado-Hernandez DL, Montero-Montoya R, Serrano-Garcia L, Arellano-Aguilar O, Jasso-Pineda Y, Yanez-Estrada L. Assessment of  
367 exposure to organochlorine pesticides and levels of DNA damage in mother-infant pairs of an agrarian community. *Environ Mol*  
368 *Mutagen*. 2013;54(2):99-111. doi:10.1002/em.21753
- 369 15. Farzan SF, Korrick S, Li Z, et al. In utero arsenic exposure and infant infection in a United States cohort: a prospective study. *Environ*  
370 *Res*. 2013;126:24-30. doi:10.1016/j.envres.2013.05.001
- 371 16. Rahman A, Vahter M, Ekstrom EC, Persson LA. Arsenic exposure in pregnancy increases the risk of lower respiratory tract infection  
372 and diarrhea during infancy in Bangladesh. *Environ Health Perspect*. 2011;119(5):719-724. doi:10.1289/ehp.1002265
- 373 17. Raqib R, Ahmed S, Sultana R, et al. Effects of in utero arsenic exposure on child immunity and morbidity in rural Bangladesh. *Toxicol*  
374 *Lett*. 2009;185(3):197-202. doi:10.1016/j.toxlet.2009.01.001
- 375 18. Rychlik KA, Sille FCM. Environmental exposures during pregnancy: Mechanistic effects on immunity. *Birth Defects Res*.  
376 2019;111(4):178-196. doi:10.1002/bdr2.1469
- 377 19. Moher D, Shamseer L, Clarke M, et al. Preferred reporting items for systematic review and meta-analysis protocols (PRISMA-P) 2015  
378 statement. *Syst Rev*. 2015;4:1. doi:10.1186/2046-4053-4-1
- 379 20. Cumpston M, Li T, Page MJ, et al. Updated guidance for trusted systematic reviews: a new edition of the Cochrane Handbook for  
380 Systematic Reviews of Interventions. *Cochrane Database Syst Rev*. 2019;10:ED000142. doi:10.1002/14651858.ED000142
- 381 21. Page MJ, McKenzie JE, Bossuyt PM, et al. The PRISMA 2020 statement: an updated guideline for reporting systematic reviews. *BMJ*.  
382 2021;372:n71. doi:10.1136/bmj.n71
- 383 22. Woodruff TJ, Sutton P. The Navigation Guide systematic review methodology: a rigorous and transparent method for translating  
384 environmental health science into better health outcomes. *Environ Health Perspect*. 2014;122(10):1007-1014.  
385 doi:10.1289/ehp.1307175
- 386 23. Higgins JPT, Thompson SG, Deeks JJ, Altman DG. Measuring inconsistency in meta-analyses. *BMJ*. 2003;327(7414):557-560.  
387 doi:10.1136/bmj.327.7414.557
- 388 24. Schmidt L, Shokraneh F, Steinhausen K, Adams CE. Introducing RAPTOR: RevMan Parsing Tool for Reviewers. *Syst Rev*. 2019;8(1):151.  
389 doi:10.1186/s13643-019-1070-0
- 390 25. Balshem H, Helfand M, Schunemann HJ, et al. GRADE guidelines: 3. Rating the quality of evidence. *J Clin Epidemiol*. 2011;64(4):401-  
391 406. doi:10.1016/j.jclinepi.2010.07.015
- 392 26. Morgan RL, Thayer KA, Bero L, et al. GRADE: Assessing the quality of evidence in environmental and occupational health. *Environ Int*.  
393 2016;92-93:611-616. doi:10.1016/j.envint.2016.01.004
- 394 27. Sastry. Techniques to study human placental transport. *Adv Drug Deliv Rev*. 1999;38(1):17-39. doi:10.1016/s0169-409x(99)00004-6
- 395 28. Myllynen P, Pasanen M, Pelkonen O. Human placenta: a human organ for developmental toxicology research and biomonitoring.  
396 *Placenta*. 2005;26(5):361-371. doi:10.1016/j.placenta.2004.09.006
- 397 29. Lehmann I. [Environmental pollutants as adjuvant factors of immune system derived diseases]. *Bundesgesundheitsblatt*  
398 *Gesundheitsforschung Gesundheitsschutz*. 2017;60(6):592-596. doi:10.1007/s00103-017-2545-6
- 399
